# Supplementary material for: Long-term fucoxanthin treatment prevents cognitive impairments and neuroinflammation via the inhibition of Nogo-A in APP/PS1 transgenic mice
Source: Royal Society of Chemistry journal article supplement (doi:10.1039/d4fo05034g), 2025-01-01
Supplement: d4fo05034g2.pdf [file d4fo05034g2.pdf]

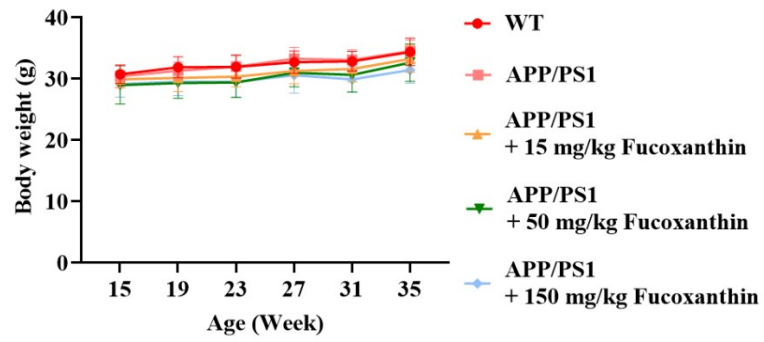

1

2 **Supplemental figure 1. The body weight was not affected by fucoxanthin in**

3 **APP/PS1 transgenic mice.**

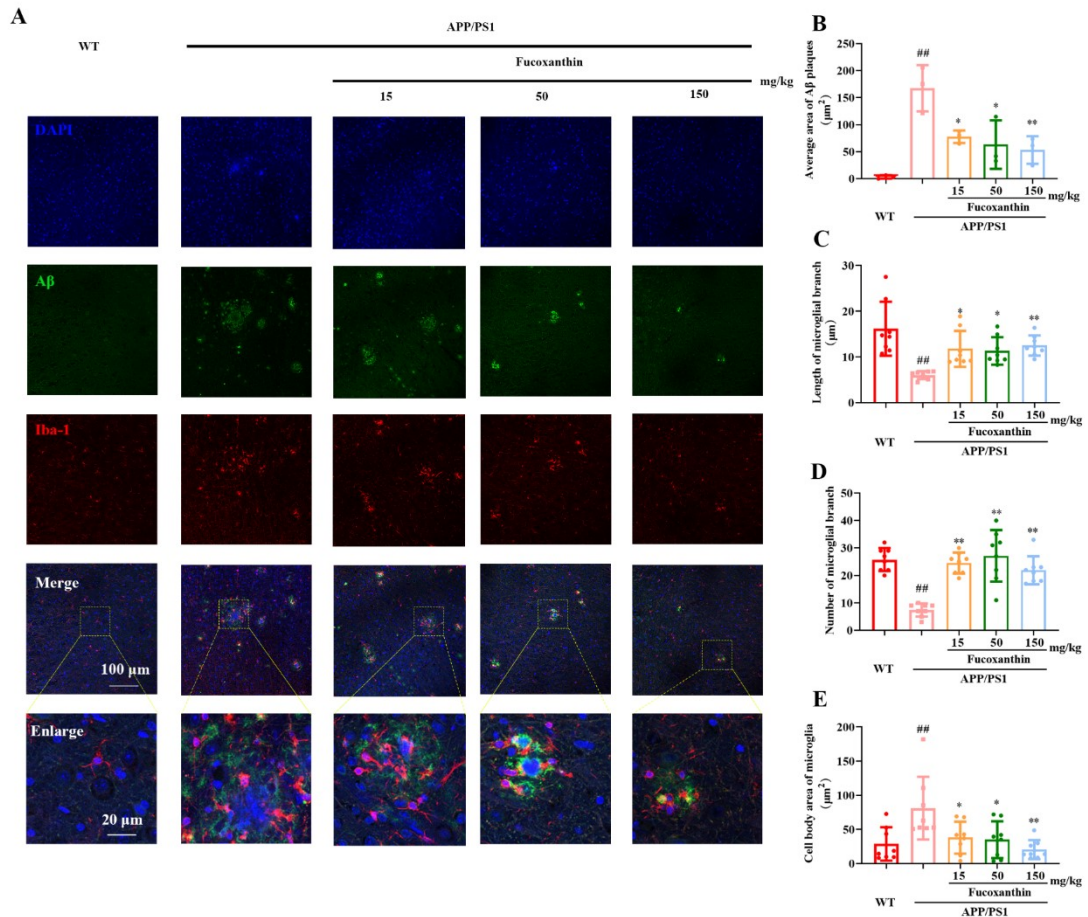

4

5 **Supplemental figure 2. Fucoxanthin prevented neuroinflammation in the cortex**  
6 **of APP/PS1 transgenic mice.** (A) Representative immunofluorescent images of  
7 cortical slices stained with Aβ and Iba-1. (B) Fucoxanthin significantly prevented the  
8 increase of Aβ area in the cortical region of APP/PS1 transgenic mice. Fucoxanthin  
9 significantly prevented the increase of (C) the average length of microglial branch, (D)  
10 the number of microglial branch, and (E) the cell body area of microglia Iba-1-positive  
11 cell body area in the cortical region of APP/PS1 transgenic mice. The data were  
12 expressed as mean ± SD, n=8, <sup>##</sup>*p* < 0.01 vs. WT group, <sup>\*</sup>*p* < 0.05 and <sup>\*\*</sup>*p* <  
13 0.01 vs. APP/PS1 group (one-way ANOVA and Tukey's test).

14
